# Supplementary material for: Correction of oxidative stress enhances enzyme replacement therapy in Pompe disease
Source: PubMed Central journal article supplement (PMC8573602; doi:10.15252/emmm.202114434), 2021-10-04
Supplement: EMMM-13-e14434-s010.pdf [file EMMM-13-e14434-s010.pdf]

## Appendix

Appendix Figure S1-Oxidative stress in single PD fibroblast cell lines

Appendix Figure S2-Time course of the effects of starvation on ROS levels in PD fibroblasts

Appendix Figure S3-Time course of ARS

Appendix Figure S4-M6PR localization in PD cells and effect of antioxidants

Appendix Figure S1

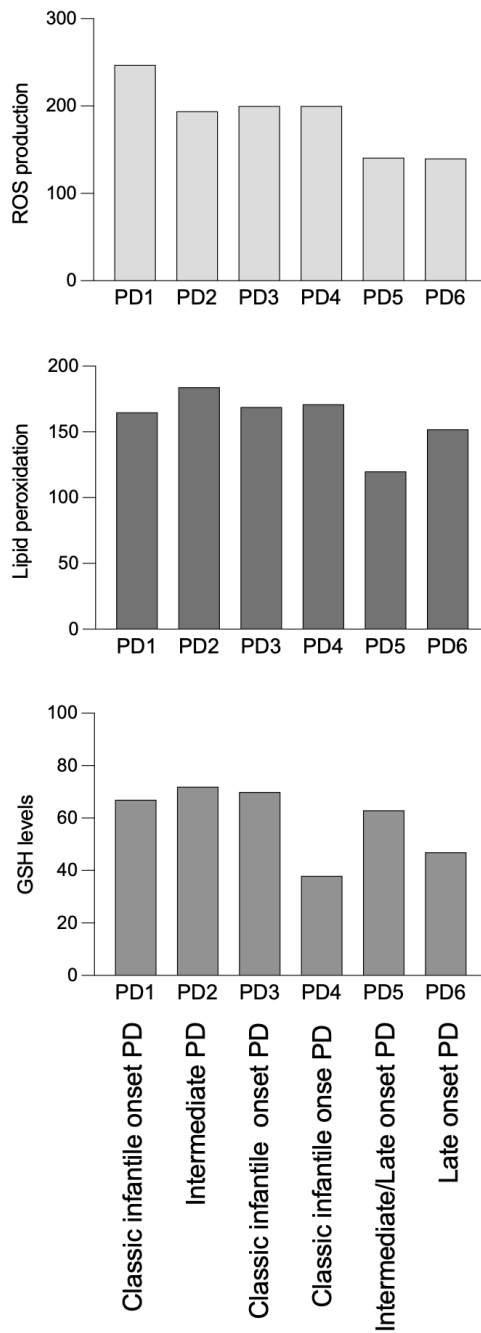

**Oxidative stress in single PD fibroblast cell lines.**

Oxidative stress biochemical markers (ROS production, lipid peroxidation, GSH levels) in individual PD patient fibroblasts. The PD clinical form for each patient is indicated.

Appendix Figure S2-Time course of the effects of starvation on ROS levels in PD fibroblasts

Appendix Figure S2

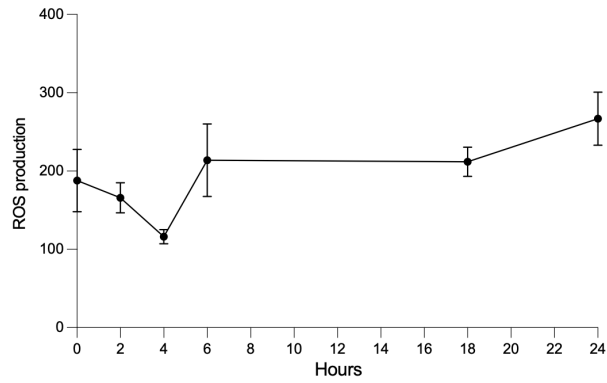

### Time course of the effects of starvation on ROS levels in PD fibroblasts

Time course of the effect of starvation on ROS production in PD fibroblasts (n=3). Starvation induced an initial decrease in the first 4 hours (likely mediated by autophagy induction), followed by progressive increase of stress up to 24 hours.

Data information: Data presented as mean  $\pm$  SD.

Appendix Figure S3

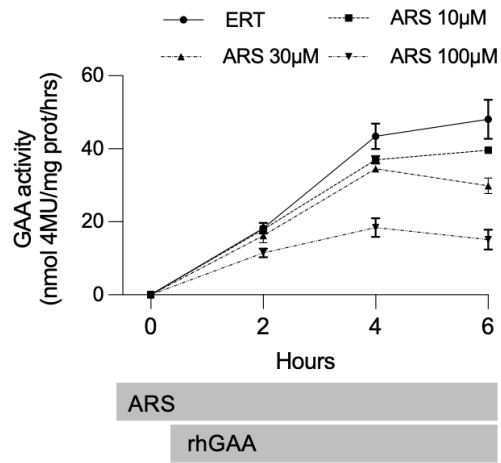

### Time course of ARS

Time course of the effects of ARS on the correction of GAA activity by rhGAA in fibroblasts (n=3), indicating a deleterious effect of ARS on the correction of GAA activity in PD cells. Data presented as a mean  $\pm$  SD of experiments performed on three PD patient cell lines.

Appendix Figure S4

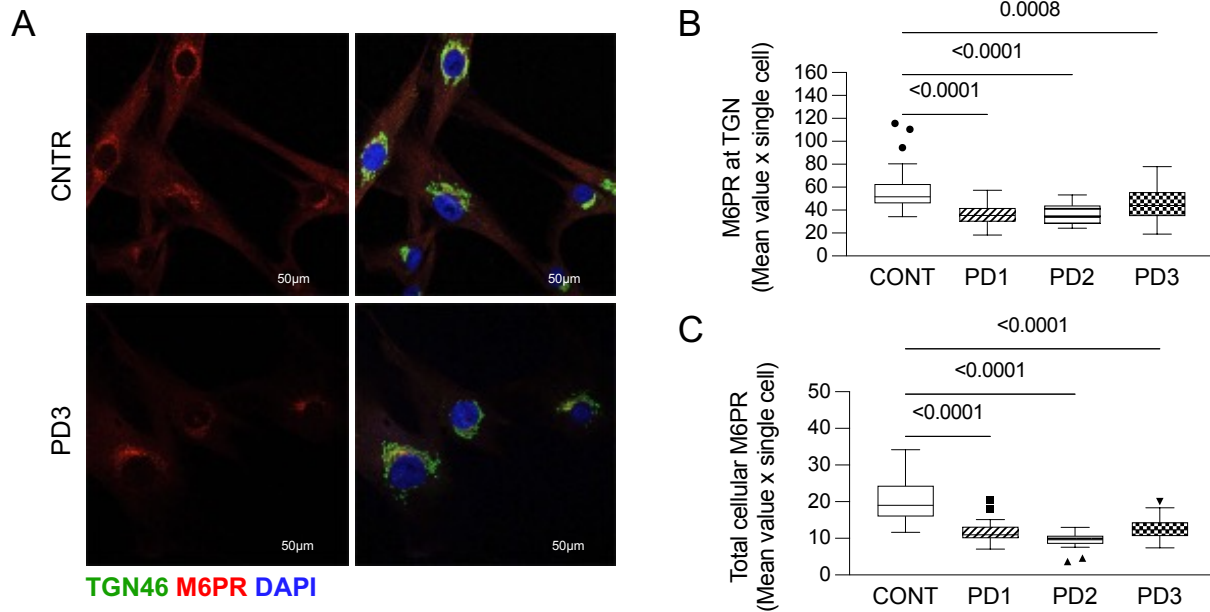

**M6PR localization in PD cells and effect of antioxidants.**

A. Immunofluorescence analysis of M6PR in PD fibroblasts and co-localization with the trans-Golgi marker TGN46. Confocal 63x images; Scale bar 50 $\mu$ m; Brightness +50%; contrast +20%.

B. C. Quantitative analysis of the M6PR amount localized at the trans-Golgi network (B) and total amount in cells (C). A significant reduction of the M6PR colocalization with TGN46 and of the total amount of M6PR signal was detectable in PD fibroblasts (n=3) compared to controls. Data presented as mean  $\pm$  SD. ANOVA was applied followed by Dunnett's multicomparison test.
